# Supplementary material
Source: PubMed Central journal article supplement (PMC8690265)
Supplement: ciab938_suppl_supplementary_materials.pdf [file ciab938_suppl_supplementary_materials.pdf]

## **SUPPLEMENTAL MATERIALS**

### **SUPPLEMENTAL METHODS**

#### **Roche Testing Procedures**

The Roche assay was performed as per manufacturer's instructions, at a single laboratory, using the same lot of reagents. Samples with an anti-SARS-CoV-2 concentration above the measuring range (250 U/ml) were diluted by the Roche analyzer with Diluent Universal at 1:10, as per manufacturer's instructions. After dilution by the analyzer, the software automatically utilized the dilution value when calculating the sample concentration, up to the maximum value of 2500 U/ml. Heat inactivation was not performed. For quality control, we used PreciControl Anti-SARS-CoV-2. These were run at least once every 24 hours. Cutoffs were determined automatically by the analyzer software based on calibrated master curves. For calibration, the method is standardized against an internal Roche standard for anti-SARS-CoV-2 provided with the assay. A pre-defined master curve is adapted to the analyzer using the kit calibration reagents. Calibration is performed once per reagent lot or following servicing of the analyzer.

#### **MSD Testing Procedures**

The MSD assay was performed as per the manufacturer's instructions, at a single laboratory. Samples were tested at a 1:5000 dilution, with the diluent provided by the manufacturer (Diluent 100). Heat inactivation was not performed. The assay includes a standard curve based on a reference standard that contains a pre-determined concentration of each antigen. It also includes three serological controls which contain a known concentration of IgG antibodies against the antigens of the assay. We ran the standard curve and serological controls on every plate to assess for quality control.

| Variables                                                       | Full Cohort<br>n=186 | Interval between doses                    |                                         | P-value <sup>1</sup> |
|-----------------------------------------------------------------|----------------------|-------------------------------------------|-----------------------------------------|----------------------|
|                                                                 |                      | Short Interval<br>(17-28 days)<br>n = 118 | Long interval<br>(42-49 days)<br>n = 68 |                      |
| Age (yr), mean (SD)                                             | 39 (10)              | 39 (9)                                    | 40 (10)                                 | 0.281                |
| Female sex at birth, n (%)                                      | 84 (45)              | 52 (44)                                   | 32 (47)                                 | 0.693                |
| Male Sex at birth, n (%)                                        | 102 (55)             | 66 (56)                                   | 36 (53)                                 |                      |
| <b>Ethnicity/Race<sup>2</sup>, n (%)</b>                        |                      |                                           |                                         |                      |
| White                                                           | 159 (85)             | 95 (80)                                   | 64 (94)                                 |                      |
| Asian                                                           | 13 (7.0)             | 10 (8.5)                                  | 3 (4.4)                                 | 0.183                |
| Other                                                           | 3 (1.6)              | 3 (2.5)                                   | 0 (0)                                   |                      |
| <b>Educational level, n (%)</b>                                 |                      |                                           |                                         |                      |
| Non-university certificate                                      | 107 (58)             | 59 (50)                                   | 48 (71)                                 |                      |
| University Bachelor's degree                                    | 71 (38)              | 54 (46)                                   | 17 (25)                                 | 0.018                |
| University Graduate degree                                      | 8 (4.3)              | 5 (4.2)                                   | 3 (4.4)                                 |                      |
| <b>Smoking History, n (%)</b>                                   |                      |                                           |                                         |                      |
| Cigarette use                                                   | 11 (5.9)             | 8 (6.8)                                   | 3 (4.4)                                 | 0.510                |
| E-cigarette use                                                 | 7 (3.8)              | 4 (3.4)                                   | 3 (4.4)                                 | 0.724                |
| <b>Past Medical History, n (%)</b>                              |                      |                                           |                                         |                      |
| Hypertension                                                    | 13 (7.4)             | 8 (6.8)                                   | 5 (7.4)                                 | 0.655                |
| Diabetes                                                        | 2 (1.1)              | 1 (0.85)                                  | 1 (1.4)                                 | 0.894                |
| Asthma                                                          | 29 (16)              | 19 (16)                                   | 10 (15)                                 | 0.943                |
| Chronic Lung disease                                            | 2 (1.1)              | 2 (1.7)                                   | 0 (0)                                   | -                    |
| Chronic Heart Disease                                           | 1 (0.54)             | 1 (0.85)                                  | 0 (0)                                   | -                    |
| Chronic Kidney disease                                          | 1 (0.54)             | 1 (0.85)                                  | 0 (0)                                   | -                    |
| Liver disease                                                   | 4 (2.2)              | 2 (1.7)                                   | 2 (2.9)                                 | -                    |
| Malignancy                                                      | 4 (2.2)              | 3 (2.5)                                   | 1 (1.4)                                 | -                    |
| Immune suppressed                                               | 6 (3.2)              | 2 (1.7)                                   | 4 (5.9)                                 | -                    |
| <b>Mass and Height, mean (SD)</b>                               |                      |                                           |                                         |                      |
| Weight (kg)                                                     | 85 (25)              | 85 (27)                                   | 85 (19)                                 | 0.928                |
| Height (m)                                                      | 1.7 (0.10)           | 1.7 (0.10)                                | 1.7 (0.10)                              | 0.810                |
| BMI (kg/m <sup>2</sup> )                                        | 30 (8.7)             | 30 (9.5)                                  | 29 (7.1)                                | 0.902                |
| <b>Vaccine, n (%)</b>                                           |                      |                                           |                                         |                      |
| Both BNT162b2                                                   | 131 (70)             | 109 (92)                                  | 22 (32)                                 |                      |
| Both mRNA-1273                                                  | 54 (29)              | 9 (7.6)                                   | 45 (66)                                 |                      |
| BNT162b2 (1 <sup>st</sup> ), mRNA-1273 (2 <sup>nd</sup> )       | 0 (0)                | 0 (0)                                     | 0 (0)                                   | <0.0001              |
| mRNA-1273 (1 <sup>st</sup> ), BNT162b2 (2 <sup>nd</sup> )       | 1 (0.54)             | 0 (0)                                     | 1 (1.47)                                |                      |
| Jan.1/21-to-1 <sup>st</sup> vacc (d), <sup>3</sup> median (IQR) | 7 (5-12)             | 6 (4-14)                                  | 8 (7-12)                                | <0.0001              |
| Vacc dosing interval (d), mean (SD)                             | 30 (10)              | 23 (2.5)                                  | 43 (1.6)                                | <0.0001              |
| 2 <sup>nd</sup> dose-to-BS interval (d), mean (SD)              | 56 (29)              | 62 (27)                                   | 46 (30)                                 | <0.0001              |
| <b>Serological Testing</b>                                      |                      |                                           |                                         |                      |
| Ortho Reactive, n (%)                                           | 186 (100)            | 118 (100)                                 | 68 (100)                                | 0.187                |
| MSD Spike (Au/mL), gM (gSD)                                     | 109,821 (3.4)        | 96,394 (3.1)                              | 137,902 (3.8)                           | 0.001                |
| Roche Spike (U/mL), mean (SD)                                   | 1909 (767)           | 1656 (766)                                | 2346 (542)                              | <0.0001              |
| MSD RBD (Au/mL), gM (gSD)                                       | 71,561 (4.1)         | 53,157 (4.1)                              | 120,813 (3.7)                           | <0.0001              |
| MSD NTD (Au/mL), gM (gSD)                                       | 1725 (4.6)           | 1462 (3.1)                                | 2294 (7.6)                              | <0.0001              |
| MSD N (Au/mL), gM (gSD)                                         | 196 (3.7)            | 152 (3.3)                                 | 303 (4.1)                               | <0.0001              |

**Supplemental Table 1: Participant Characteristics and Serology Results, Overall and Classified by Vaccine Dosing Interval Group**

<sup>1</sup> Compared using the Mann-Whitney U-test (serological testing), Pearson chi-square test (ethnicity, educational level, past medical history, sex, smoking history, vaccine type), Wilcoxon signed rank test ("Jan.1-to-1<sup>st</sup> vaccine"),

and independent sample t-test (age, weight, height, BMI). Ethnicity and education were assessed using 3-level variables

<sup>2</sup> Participants were asked “How would you describe your ethnicity or race?”; “Asian” includes *Southeast Asian, West Asian, Chinese, Japanese, Korean*

<sup>3</sup> Median date of first vaccine Jan. 8, 2021; mean date of first vaccine Jan. 11, 2021

n, number; SD, standard deviation; BMI, body mass index; Vacc, vaccine; BS, blood sampling date; d, day; MSD, Meso Scale Discovery; MSD, RBD, receptor binding domain; NTD, spike N terminal domain; N, nucleocapsid; gM, geographic mean; gSD, geometric standard deviation

| Model       | P value of interaction term |
|-------------|-----------------------------|
| MSD Spike   | 0.842                       |
| MSD RBD     | 0.785                       |
| MSD NTD     | 0.300                       |
| MSD N       | 0.767                       |
| Roche Spike | 0.968                       |

**Supplemental Table 2: Secondary Analyses Including an Interaction Terms for Vaccine Type and Dosing Interval Group**

Analysis used an interaction term between vaccine-type and dosing interval-group for each model, adjusting for the second vaccine-to-blood sampling interval.

P value shown is for the interaction term.

MSD, Meso Scale Discovery; MSD, RBD, receptor binding domain; NTD, spike N terminal domain; N, nucleocapsid

| Antibody tests | Coeff ( $\beta$ ) | Test for regression coefficients |         |
|----------------|-------------------|----------------------------------|---------|
|                |                   | t-test                           | P-value |
| MSD Spike      | 40638.88          | 2.210                            | 0.029   |
| MSD RBD        | 61641.72          | 3.857                            | <0.0001 |
| MSD NTD        | 1608.11           | 3.580                            | <0.0001 |
| MSD N          | 533.93            | 1.411                            | 0.160   |
| Roche Spike    | 723.43            | 7.199                            | <0.0001 |

**Supplemental Table 3: Results of Regression Model including covariates of Educational Level and Ethnicity/Race**

Multiple linear regression for the association between vaccine dosing interval group and quantitative antibodies, adjusted for second vaccine-to-blood sampling interval (days), educational level and race. Coeff ( $\beta$ ): is the regression coefficient of the dosing interval (long interval versus short interval [reference])

For ethnicity/race data, participants were asked “How would you describe your ethnicity or race?”

MSD, Meso Scale Discovery; MSD, RBD, receptor binding domain; NTD, spike N terminal domain; N, nucleocapsid; gM, geographic mean

| Antibody tests | BNT162b2 (Pfizer) vaccine (n= 124) |                   |                                 |         | mRNA-1273 (Moderna) vaccine (n=48) |                   |                                 |         |
|----------------|------------------------------------|-------------------|---------------------------------|---------|------------------------------------|-------------------|---------------------------------|---------|
|                | Antibody Concentration             |                   | Test for regression coefficient |         | Antibody Concentration             |                   | Test for regression coefficient |         |
|                | Short Interval, gM                 | Long Interval, gM | T-test                          | P-value | Short Interval, gM                 | Long Interval, gM | T-test                          | P-value |
| MSD Spike      | 97,545                             | 154,498           | 1.667                           | 0.098   | 142,524                            | 146,247           | 0.327                           | 0.745   |
| MSD RBD        | 54,441                             | 127,073           | 3.041                           | 0.003   | 86513                              | 113,242           | 1.123                           | 0.267   |
| MSD NTD        | 1487                               | 2,811             | 3.383                           | 0.001   | 2392                               | 2086              | 0.543                           | 0.589   |
| MSD N          | 147                                | 401               | 2.580                           | 0.011   | 251                                | 225               | 0.020                           | 0.984   |
| Roche Spike    | 1390                               | 2475              | 4.457                           | <0.0001 | 1991                               | 2471              | 3.209                           | <0.0001 |

**Supplemental Table 4: Adjusted Linear Regression models comparing vaccine dosing intervals within strata defined by vaccine type.**

Model was adjusted for second vaccine-to-blood sampling interval (days)

MSD, Meso Scale Discovery; MSD, RBD, receptor binding domain; NTD, spike N terminal domain; N, nucleocapsid; gM, geographic mean

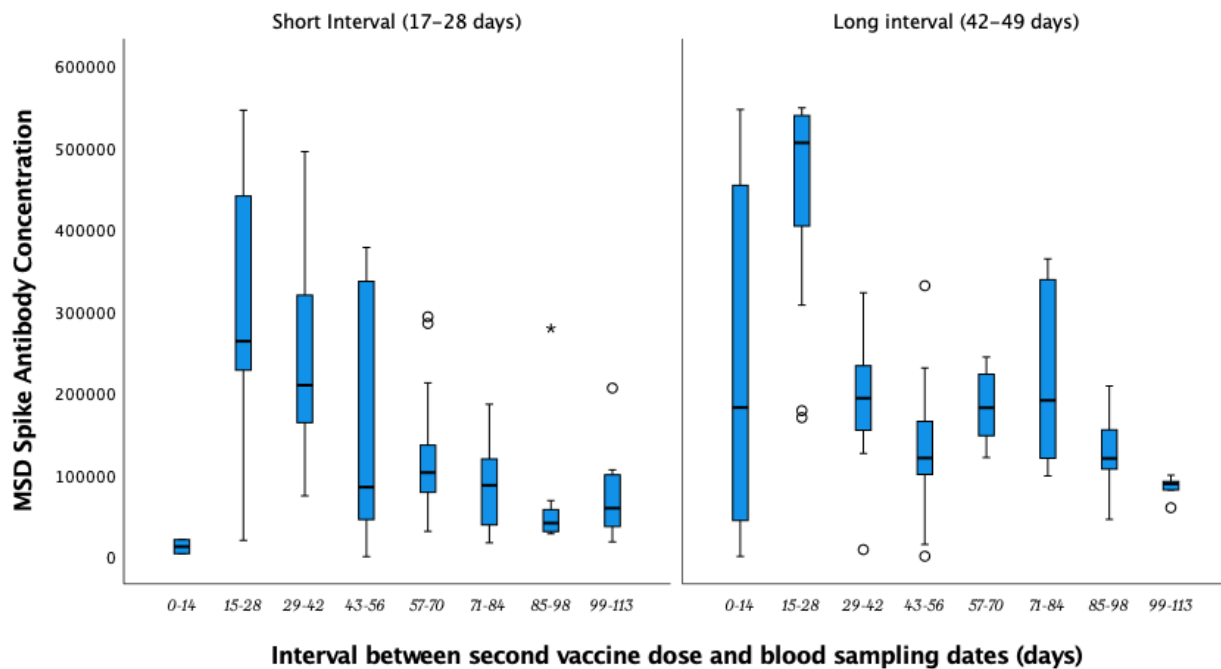

**Supplemental Figure 1: Box plots of the MSD Spike antibody concentration (Au/mL), stratified by the second vaccine dose-to-blood sampling interval**

Black line is the median value, boxes are the inter-quartile range (IQR), whiskers include the full range of values (restricted to a maximum of IQR\*1.5 above the 75<sup>th</sup> percentile, above which outliers are represented as individual data points)

MSD, Meso Scale Discovery

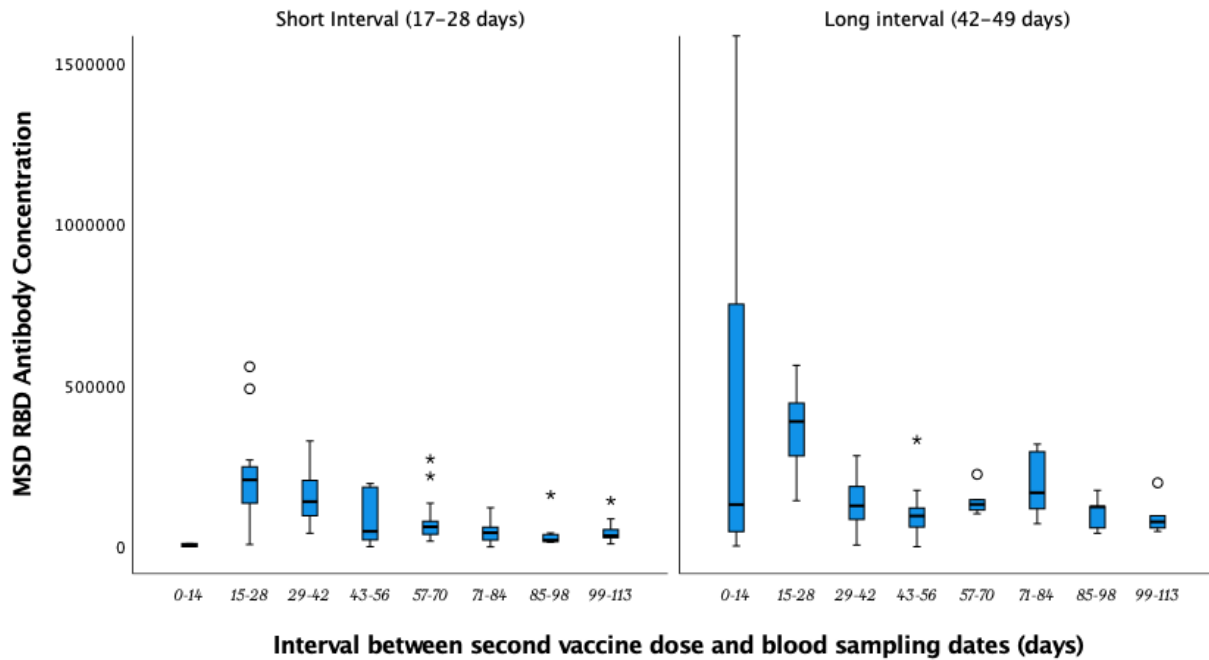

**Supplemental Figure 2: Box plots of the MSD RBD antibody concentration (Au/mL), stratified by the second vaccine dose to blood sampling interval**

Black line is the median value, boxes are the inter-quartile range (IQR), whiskers include the full range of values (restricted to a maximum of IQR\*1.5 above the 75<sup>th</sup> percentile, above which outliers are represented as individual data points)

MSD, Meso Scale Discovery; MSD, RBD, receptor binding domain



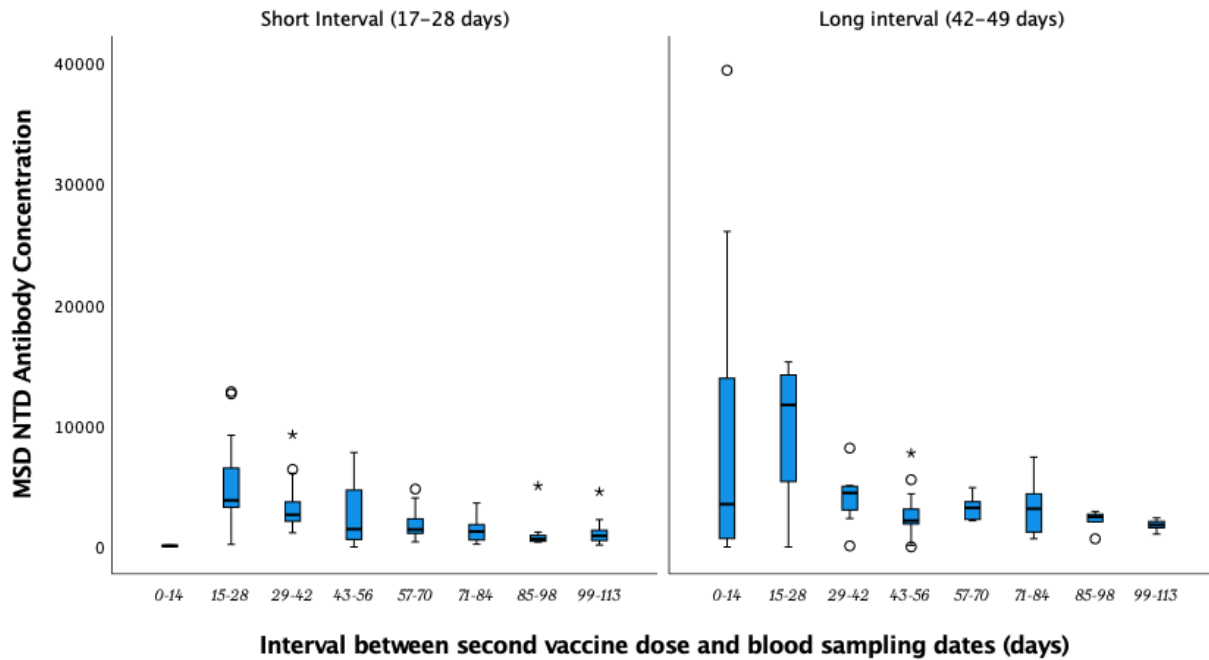

**Supplemental Figure 3: Box plots of the MSD NTD antibody concentration (Au/mL), stratified by the second vaccine dose-to-blood sampling interval**

Black line is the median value, boxes are the inter-quartile range (IQR), whiskers include the full range of values (restricted to a maximum of IQR\*1.5 above the 75<sup>th</sup> percentile, above which outliers are represented as individual data points)

MSD, Meso Scale Discovery; NTD, spike N terminal domain

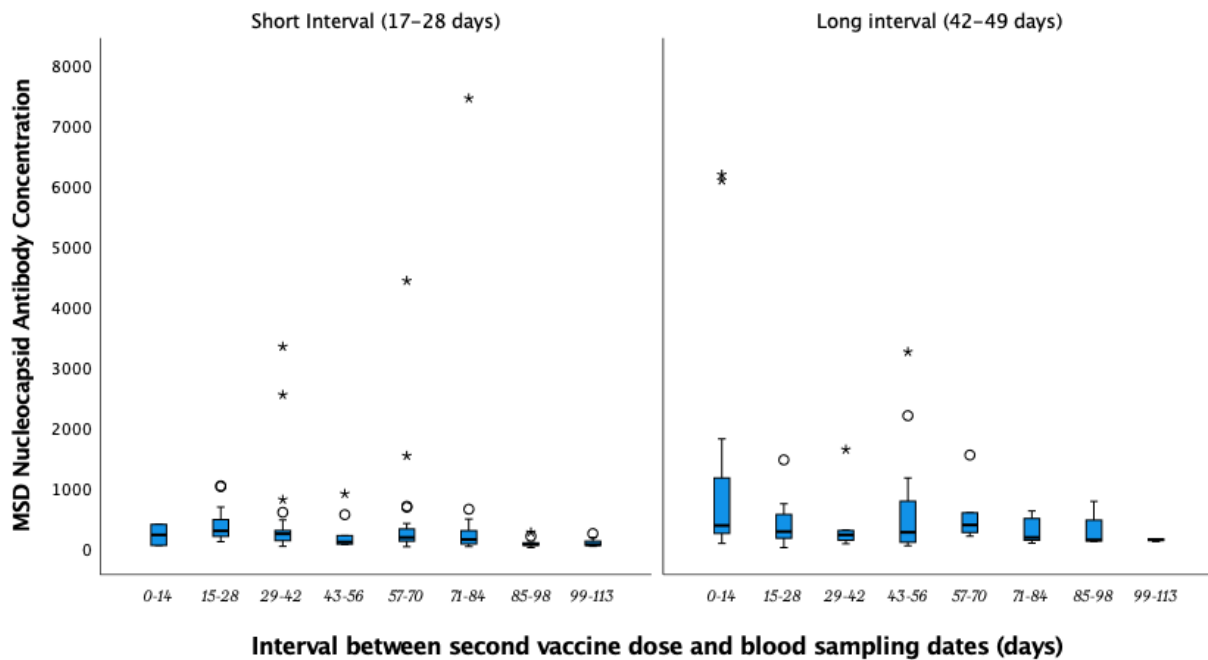

**Supplemental Figure 4: Box plots of the MSD Nucleocapsid antibody concentration (Au/mL), stratified by the second vaccine dose-to-blood sampling interval**

Black line is the median value, boxes are the inter-quartile range (IQR), whiskers include the full range of values (restricted to a maximum of IQR\*1.5 above the 75<sup>th</sup> percentile, above which outliers are represented as individual data points)

MSD, Meso Scale Discovery

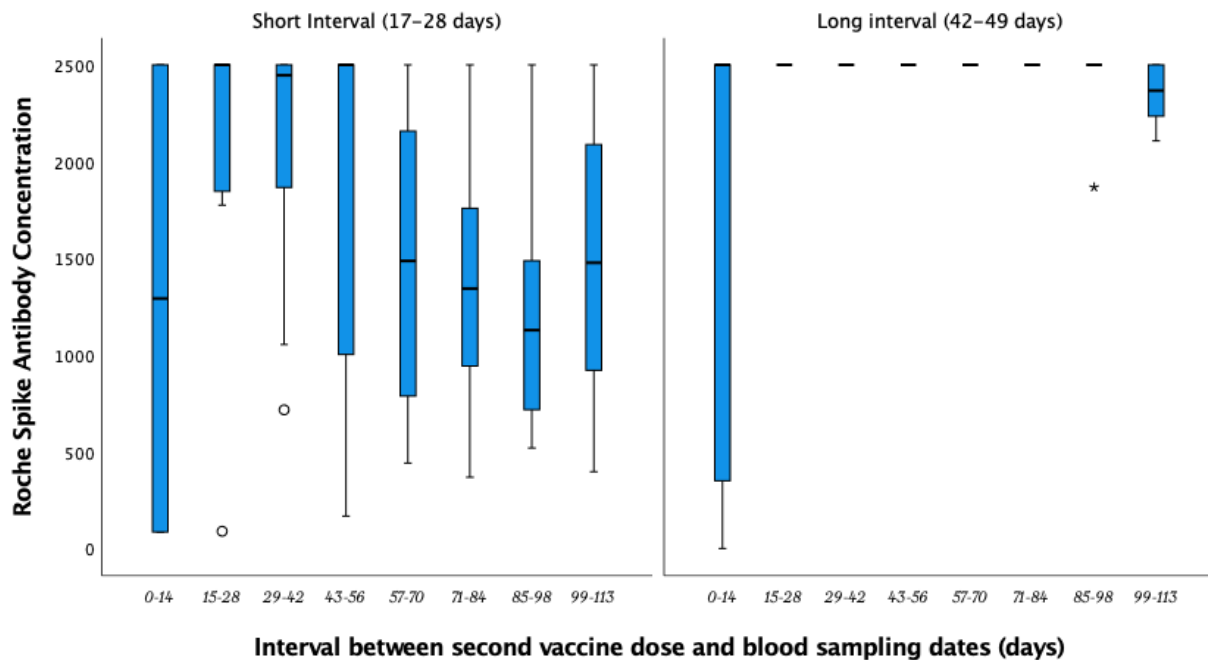

**Supplemental Figure 5: Box plots of the Roche Spike antibody concentration (U/mL), stratified by the second vaccine dose-to-blood sampling interval**

The maximum value of 2500 U/mL occurred in 35 (30%) samples of the short interval, and 60 (88%) samples of the long interval group

Black line is the median value, boxes are the inter-quartile range (IQR), whiskers include the full range of values (restricted to a maximum of  $IQR \times 1.5$  above the 75<sup>th</sup> percentile, above which outliers are represented as individual data points)
